# Supplementary material for: De novo transcriptome assemblies of four xylem sap-feeding insects
Source: PubMed Central journal article supplement (PMC5467018; doi:10.1093/gigascience/giw007), 2017-02-24
Supplement: giw007_GIGA-D-16-00077_Original-Submission.pdf [file giw007_GIGA-D-16-00077_Original-Submission.pdf]

[Click here to view linked References](#)

1  
2  
3  
4  
5  
6  
7  
8  
9  
10  
11  
12  
13  
14  
15  
16  
17  
18  
19  
20  
21  
22  
23  
24  
25  
26  
27  
28  
29  
30  
31  
32  
33  
34  
35  
36  
37  
38  
39  
40  
41  
42  
43  
44  
45  
46  
47  
48  
49  
50  
51  
52  
53  
54  
55  
56  
57  
58  
59  
60  
61  
62  
63  
64  
65

1 Data Note for: *GigaScience*

Corresponding author:

Steven J. Castle  
USDA ARS  
U.S.-ALARC  
21881 N. Cardon Lane  
Maricopa, AZ 85138  
Tel: 520-316-6338 Fax: 520-316-6300  
Steven.castle@ars.usda.gov

10

## 11 ***De novo* transcriptome assemblies of four xylem sap-feeding insects**

12

13 Erica E. Tassone<sup>1</sup>, Charles C. Cowden<sup>2</sup> and S.J. Castle<sup>2\*</sup>

14

15 <sup>1</sup> Plant Physiology and Genetics Research Unit, U.S. Arid Land Agricultural Research Center,  
16 USDA ARS, Maricopa, AZ 85138 USA

17 <sup>2</sup> Pest Management and Biocontrol Research Unit, U.S. Arid Land Agricultural Research Center,  
18 USDA ARS, Maricopa, AZ 85138 USA

19

20 \*Corresponding Author

21

22

23

24

25

26

27

28

29

30

31

32

33

34

35

36

37

38

39

40

41

42

43

44

45

46

47

1  
2  
3  
4  
5  
6  
7  
8  
9  
10  
11  
12  
13  
14  
15  
16  
17  
18  
19  
20  
21  
22  
23  
24  
25  
26  
27  
28  
29  
30  
31  
32  
33  
34  
35  
36  
37  
38  
39  
40  
41  
42  
43  
44  
45  
46  
47  
48  
49  
50  
51  
52  
53  
54  
55  
56  
57  
58  
59  
60  
61  
62  
63  
64  
65

35 **Abstract**

36 **Background:** Spittle bugs and sharpshooters are well-known xylem sap-feeding insects and  
37 vectors of the phytopathogenic bacterium *Xylella fastidiosa* (Wells), a causal agent of Pierce’s  
38 disease of grapevines and other crop diseases. Specialized feeding on nutrient-deficient xylem  
39 sap is relatively rare among insect herbivores, and only limited genomic and transcriptomic  
40 information has been generated for xylem-sap feeders. To develop a more comprehensive  
41 understanding of biochemical adaptations and symbiotic relationships that support survival on a  
42 nutritionally austere dietary source, transcriptome assemblies for three sharpshooter species and  
43 one spittlebug species were produced.

44 **Findings:** Trinity-based *de novo* transcriptome assemblies were generated for all four xylem-sap  
45 feeders using raw sequencing data originating from whole-insect preps. Total transcripts for each  
46 species ranged from 91,384 for *Cuernia arida* to 106,998 for *Homalodisca liturata* with transcript  
47 totals for *Graphocephala atropunctata* and the spittlebug *Clastoptera arizonana* falling in  
48 between. The percentage of transcripts comprising complete open reading frames ranged from  
49 60% for *H. liturata* to 82% for *C. arizonana*. BUSCO analyses for each dataset indicated quality  
50 assemblies and a high degree of completeness for all four species.

51 **Conclusions:** These four transcriptomes represent a significant expansion of data for insect  
52 herbivores that feed exclusively on xylem sap, a nutritionally deficient dietary source relative to  
53 other plant tissues and fluids. Comparison of transcriptome data with insect herbivores that  
54 utilize other dietary sources may illuminate fundamental differences in the biochemistry of  
55 dietary specialization.

56 **Keywords:** Transcriptome, RNA-seq, Trinity, Insect herbivory, Endosymbiont

1  
2  
3  
4  
5  
6  
7  
8  
9  
10  
11  
12  
13  
14  
15  
16  
17  
18  
19  
20  
21  
22  
23  
24  
25  
26  
27  
28  
29  
30  
31  
32  
33  
34  
35  
36  
37  
38  
39  
40  
41  
42  
43  
44  
45  
46  
47  
48  
49  
50  
51  
52  
53  
54  
55  
56  
57  
58  
59  
60  
61  
62  
63  
64  
65

**57 Data description**

**58 Background**

59 Resource partitioning among herbivorous insects spans a continuum between specialists that feed  
60 on one or a few plant species to generalists that are able to utilize hundreds of species belonging  
61 to multiple plant families. A further element of plant partitioning involves the particular location  
62 on a plant or tissue type from which an insect feeds [1]. The diversity of plant feeding strategies  
63 has evolved along with specialized anatomical features such as mouthparts and digestive  
64 systems, unique enzyme complements for processing plant compounds, and partnerships with  
65 symbiotic microbiota that contribute to nutritional gain of the host insect. The transcriptome  
66 assemblies presented here include four species that feed exclusively on sap from xylem vessels, a  
67 relatively rare form of plant feeding from a source that among plant tissues is the most deficient  
68 in nitrogen and carbon content [2]. Three of the transcriptomes represent sharpshooter species  
69 (Cicadellinae) and the fourth belongs to a spittlebug (Clastopterae), all members of the  
70 hemipteran suborder Auchenorrhyncha. Their piercing-sucking mouthparts tap into xylem  
71 vessels from which sap is consumed in copious quantities to compensate for its low nutritional  
72 value. Sharpshooters are recognized for their efficient assimilation of limited nutrients in xylem  
73 sap [3], but putative biochemical mechanisms that enable specialization on xylem sap are  
74 unknown. Also unclear is whether the respective roles in host nutrition played by the dual  
75 primary endosymbionts are consistent among xylem feeders [4]. Comparison of transcriptomes  
76 of four xylem-feeding insects will provide additional knowledge and insight into the survival of  
77 ecological specialists on a nutritionally impoverished dietary source.

**78 Samples**

1  
2  
3  
4 79 The spittlebug *Clastoptera arizonana* Doering was collected in 2014 from a wild population  
5  
6  
7 80 infesting grapevines in Yavapai County, Arizona and established as a glasshouse colony for eight  
8  
9 81 months prior to sample collection in Maricopa, AZ. Samples of the sharpshooter *Cuerna arida*  
10  
11 82 Oman and Beamer (tribe Proconiini) were collected in 2015 by sweep net from a wild population  
12  
13  
14 83 in mixed vegetation in Cochise County, Arizona. The smoke-tree sharpshooter *Homalodisca*  
15  
16 84 *liturata* Ball (Proconiini) was collected in 2015 from *Euphorbia tirucalli* L. plants in Phoenix,  
17  
18  
19 85 AZ. The blue-green sharpshooter *Graphocephala atropunctata* (Signoret) (Cicadellini) was  
20  
21 86 collected in 2013 from a wild population in Orange County, California and maintained as a  
22  
23  
24 87 glasshouse colony on basil (*Osimium basilicum* L.) until samples were collected in 2015. Adult,  
25  
26 88 whole-body samples from all four species were homogenized separately in RNeasy®  
27  
28 89 (Ambion/Life Technologies, Carlsbad, CA) and stored at -20°C. Total RNA extraction, library  
29  
30  
31 90 generation (TruSeq RNA Sample Preparation Kit v2; Illumina Inc., San Diego, USA) and  
32  
33  
34 91 sequencing (Illumina HiSeq2000 or HiSeq2500) were performed at the University of Arizona  
35  
36 92 Genomics Center in Tucson, AZ (<http://uagc.arl.arizona.edu>).

### 93 94 **Data filtering**

95 The total number of reads, data quantity, and short read archive (SRA) numbers for each of the  
96 four xylem-feeding insects are shown in Table 1. For each data set, raw quality was assessed and  
97 filtered using both FastQC and Trimmomatic (v 0.32) using the parameters  
98 ILLUMINACLIP:TruSeq3-PE.fa:2:30:10 LEADING:10 TRAILING:20  
99 SLIDINGWINDOW:4:25 MINLEN:36 to remove adaptor sequence and filter by quality score.

### 100 **Transcriptome assembly**

1  
2  
3  
4  
5  
6  
7  
8  
9  
10  
11  
12  
13  
14  
15  
16  
17  
18  
19  
20  
21  
22  
23  
24  
25  
26  
27  
28  
29  
30  
31  
32  
33  
34  
35  
36  
37  
38  
39  
40  
41  
42  
43  
44  
45  
46  
47  
48  
49  
50  
51  
52  
53  
54  
55  
56  
57  
58  
59  
60  
61  
62  
63  
64  
65

101 All raw data for each insect transcriptome were run through the following pipeline. Prior to  
102 assembly, the three replicate samples were concatenated and read abundance was normalized to  
103 50X coverage using the *in silico* normalization tool in Trinity v. 2.0.6 [5] to improve assembly  
104 time. Each of the datasets were assembled in Trinity using the default parameters, with the  
105 addition of the ‘-jaccard clip’ flag to reduce the generation of transcript fusions from non-strand  
106 specific data. Open reading frames (ORFs) were predicted using Transdecoder [5]. The  
107 transcriptomes were filtered, sorted, and prepared for NCBI transcriptome shotgun assembly  
108 (TSA) submission as previously described [6].

109 **Annotation**

110 Functional annotation for each of the transcriptomes was performed at the peptide level using a  
111 custom pipeline [6] that defines protein products and assigns transcript names. Predicted proteins  
112 and peptides were analyzed using InterProScan 5 [7], using the ‘-iprlookup’ and ‘-goterms’  
113 flags, to search all available databases, including Gene Ontology (GO). Each transcriptome was  
114 annotated using BLASTp against the UniProt Swiss Prot database (downloaded 11 February  
115 2015). Annie [8], a program that cross-references SwissProt BLAST and InterProScan5 results to  
116 extract qualified gene names and products, was used to generate the transcript annotation file.  
117 The resulting .gff3 and .tbl files were further annotated with functional descriptors in  
118 Transvestigator [9].

119  
120 **Transcriptome Quality and Comparisons**

121 Each of the assembled transcriptomes for the four xylem-feeding insects was used in a reciprocal  
122 tBLASTx search to identify similarities between the four species and their transcriptome

1  
2  
3  
4 123 assemblies. The final, filtered transcriptomes were made into nucleotide BLAST databases using  
5  
6 124 NCBI Blast+ (v 2.2.30) *makeblastdb* tool and all tBLASTx searches were performed using an e-  
7  
8  
9 125 value cutoff of  $1e^{-3}$ . The tBLASTx results (Table 3) indicate similarities between the four xylem-  
10  
11  
12 126 feeder transcriptomes, with the lowest (38%) occurring between species (e.g. the spittlebug and  
13  
14 127 all sharpshooters) and the highest (84%) between the sharpshooters *H. liturata* and *C. arida* [12].  
15  
16  
17 128 Additional transcriptome metrics between assemblies show a high percentage of reads mapping  
18  
19 129 back to each transcriptome (Table 2) indicating successful assemblies. The TransRate [10] scores  
20  
21  
22 130 range from 0.16 to 0.42 and BUSCO v. 1.1.b1 (benchmarking universal single-copy orthologs)  
23  
24 131 results using the arthropod gene set (downloaded December 19, 2015) [11] indicate the four  
25  
26  
27 132 transcriptomes have a moderate to high level of completeness. It should be noted that both the  
28  
29  
30 133 TransRate value (0.16) and BUSCO results for *H. litruata* suggest this transcriptome may  
31  
32 134 contain more partial transcripts than the other three assemblies.  
33  
34

### 35 135 **Availability of supporting data**

36  
37  
38 136 The filtered and annotated transcriptomes have been deposited in GenBank as a TSA under the  
39  
40  
41 137 accessions and BioProject numbers found in Table 1. Datasets further supporting the results of  
42  
43 138 this article are available in the *GigaScience* repository, GigaDB [12].  
44  
45

### 46 139 **Abbreviations**

47  
48  
49 140 ALARC: Arid Land Agricultural Research Center; BUSCO: Bench-marking Universal Single-  
50  
51  
52 141 Copy Orthologs; GO: Gene Ontology; ORF: Open Reading Frame; SRA: Short Read Archive;  
53  
54 142 TSA: Transcriptome Shotgun Assembly; USDA-ARS: United States Department of Agriculture-  
55  
56  
57 143 Agricultural Research Service  
58  
59 144

1  
2  
3  
4  
5  
6  
7  
8  
9  
10  
11  
12  
13  
14  
15  
16  
17  
18  
19  
20  
21  
22  
23  
24  
25  
26  
27  
28  
29  
30  
31  
32  
33  
34  
35  
36  
37  
38  
39  
40  
41  
42  
43  
44  
45  
46  
47  
48  
49  
50  
51  
52  
53  
54  
55  
56  
57  
58  
59  
60  
61  
62  
63  
64  
65

145 **Competing Interests**

146 The authors declare that they have no competing interests.

147 **Authors Contribution**

148 SJC and CCC conceived and performed the experiments; EET analyzed the data and evaluated  
149 the conclusions; EET, SJC, and CCC wrote the manuscript. All authors approved the final  
150 manuscript.

151 **Acknowledgements**

152 The authors thank Tom Perring and Darcy Reed at UC Riverside for providing samples of *G.*  
153 *atropunctata* for transcriptome evaluations. Bioinformatic analysis was performed on computing  
154 resources available at ALARC. Mention of trade names or commercial products in this article is  
155 solely for the purpose of providing specific information and does not imply recommendation or  
156 endorsement by the US Department of Agriculture. USDA is an equal opportunity provider and  
157 employer.

158

159 **References**

160

- 161 1. Schoonhoven LM, Van Loon JJA, Dicke M. Insect-plant biology. Oxford University  
162 Press, New York. 2005, 421 pp.
- 163 2. Mattson WJ. Herbivory in relation to plant nitrogen content. *Ann. Rev. Ecol. Syst.*  
164 1980;11:119-161.
- 165 3. Brodbeck BV, Mizell RF, Andersen PC. Physiological and behavioral adaptations of  
166 three species of leafhoppers in response to the dilute nutrient content of xylem fluid. *J.*  
167 *Insect Physiol.* 1993;39:73-81.

171

1  
2  
3  
4  
5  
6  
7  
8  
9  
10  
11  
12  
13  
14  
15  
16  
17  
18  
19  
20  
21  
22  
23  
24  
25  
26  
27  
28  
29  
30  
31  
32  
33  
34  
35  
36  
37  
38  
39  
40  
41  
42  
43  
44  
45  
46  
47  
48  
49  
50  
51  
52  
53  
54  
55  
56  
57  
58  
59  
60  
61  
62  
63  
64  
65

4. Moran NA, Tran P, Gerardo NM. Symbiosis and insect diversification: an ancient symbiont of sap-feeding insects from the bacterial phylum *Bacteroidetes*. *Appl. Environ. Microbiol.* 2005;71:8802-8810.
5. Haas BJ, Papanicolaou A, Yassour M, Grabherr M, Blood PD, Bowden J, et al. *De novo* transcript sequence reconstruction from RNA-seq using the Trinity platform for reference generation and analysis. *Nat. Protoc.* 2013;8:1494-1512.
6. Sim SB, Calla B, Hall B, DeRego T, Geib SM. Reconstructing a comprehensive transcriptome assembly of a white-pupal translocated strain of the pest fruit fly *Bactrocera cucurbitae*. *Gigascience.* 2015;4:14.
7. Jones P, Binns D, Chang HY, Fraser M, Li W, McAnulla C, et al. InterProScan 5: genome-scale protein function classification. *Bioinformatics.* 2014;30:1236-40. Accessed 9 November 2015.
8. Tate R, Hall B, DeRego T. Annie the functional annotator - initial release. ZENODO. 2014. <http://doi.org/10.5281/zenodo.10470>. Accessed 27 November 2015.
9. DeRego T, Hall B, Tate R, Geib S. Transvestigator early release. ZENODO. 2014. <http://doi.org/10.5281/zenodo.10471>. Accessed 27 November 2015.
10. Smith-Unna RD, Bournsnel C, Patro R, Hibberd JM, Kelly S. TransRate: reference free quality assessment of de-novo transcriptome assemblies. *bioRxiv.* 2015. <http://dx.doi.org/10.1101/021626>. Accessed 17 September 2015.
11. Simão FA, Waterhouse RM, Ioannidis P, Kriventseva EV, Zdobnov EM. BUSCO: assessing genome assembly and annotation completeness with single-copy orthologs. *Bioinformatics.* 2015;13:3210-2. doi:10.1093/bioinformatics/btv351. Accessed 4 April 2016.
12. Tassone EE, Cowden CC, and Castle SJ (2016): Supporting data for “*De novo* transcriptome assemblies of four xylem sap-feeding insects.” *GigaScience* Database. <http://dx.doi.org/XXXXXX/XXXX>



218 **Table 1.** Accession numbers for sequence reads and assembled transcripts for four species of  
 219 xylem-feeding insects.

| Sample                            | Reads      | Size (Gb) | Short Read Archive | BioSample    | BioProject  |
|-----------------------------------|------------|-----------|--------------------|--------------|-------------|
| <i>Homalodisca liturata</i>       | 18,936,520 | 18.9      | SRX1451710         | SAMN04293489 | PRJNA303151 |
|                                   |            |           | SRX1451711         | SAMN04293490 | “           |
|                                   |            |           | SRX1451712         | SAMN04293491 | “           |
| <i>Clastoptera arizonana</i>      | 19,038,998 | 17.8      | SRX1451715         | SAMN04293493 | PRJNA303152 |
|                                   |            |           | SRX1451717         | SAMN04293494 | “           |
|                                   |            |           | SRX1451718         | SAMN04293495 | “           |
| <i>Cuerna arida</i>               | 14,667,040 | 18.3      | SRX1451216         | SAMN04292971 | PRJNA303150 |
|                                   |            |           | SRX1451218         | SAMN04292972 | “           |
|                                   |            |           | SRX1451467         | SAMN04292973 | “           |
| <i>Graphocephala atropunctata</i> | 16,868,134 | 8.2       | SRX1411425         | SAMN04208332 | PRJNA299492 |
|                                   |            |           | SRX1411426         | SAMN04208333 | “           |
|                                   |            |           | SRX1411427         | SAMN04208334 | “           |

220  
 221  
 222  
 223 **Table 2.** Comparison of transcriptome assembly statistics and BUSCO analysis results for four  
 224 xylem-feeding insects.

|                                     | <i>H. liturata</i>    | <i>C. arizonana</i>     | <i>C. arida</i>       | <i>G. atropunctata</i> |
|-------------------------------------|-----------------------|-------------------------|-----------------------|------------------------|
| <b>Assembly</b>                     |                       |                         |                       |                        |
| Normalized reads                    | 9,468,260             | 9,519,499               | 10,714,375            | 32,429,458             |
| Total no. transcripts               | 106,998               | 93,845                  | 91,384                | 97,830                 |
| Average transcript length and range | 954<br>(224 – 30,062) | 1,232<br>(224 – 29,936) | 901<br>(224 – 20,095) | 962<br>(224 – 17,082)  |
| Total assembled bases               | 102,317,189           | 115,686,868             | 79,785,471            | 94,141,447             |
| N50                                 | 1,650                 | 2,510                   | 1,560                 | 1,692                  |
| % GC                                | 37                    | 31                      | 37                    | 39                     |
| % mapping                           | 84                    | 91                      | 88                    | 95                     |
| TransRate Score                     | 0.16                  | 0.28                    | 0.25                  | 0.42                   |
| <b>BUSCO</b>                        |                       |                         |                       |                        |
| Complete (%)                        | 60                    | 82                      | 68                    | 66                     |
| Duplicated (%)                      | 23                    | 42                      | 26                    | 24                     |
| Fragmented (%)                      | 23                    | 9.2                     | 17                    | 19                     |
| Missing (%)                         | 15                    | 8                       | 14                    | 13                     |

1  
2  
3  
4  
5  
6  
7  
8  
9  
10  
11  
12  
13  
14  
15  
16  
17  
18  
19  
20  
21  
22  
23  
24  
25  
26  
27  
28  
29  
30  
31  
32  
33  
34  
35  
36  
37  
38  
39  
40  
41  
42  
43  
44  
45  
46  
47  
48  
49  
50  
51  
52  
53  
54  
55  
56  
57  
58  
59  
60  
61  
62  
63  
64  
65

**Table 3.** Total percent matches from tBLASTx reciprocal searches. Transcriptome used as query on the left, and nucleotide database tBLASTx against which the query was performed is shown at the top.

|                                   | Nucleotide Database (% similarity) |                     |                 |                        |
|-----------------------------------|------------------------------------|---------------------|-----------------|------------------------|
|                                   | <i>H. liturata</i>                 | <i>C. arizonana</i> | <i>C. arida</i> | <i>G. atropunctata</i> |
| <i>Homalodisca liturata</i>       | --                                 | 42.94               | 76.31           | 56.2                   |
| <i>Clastoptera arizonana</i>      | 40.9                               | --                  | 38.35           | 38.58                  |
| <i>Cuerna arida</i>               | 83.9                               | 43.4                | --              | 58.36                  |
| <i>Graphocephala atropunctata</i> | 56.86                              | 40.3                | 56.1            | --                     |

e-value  $\leq 1^{E-3}$

230  
231
